# Supplementary material
Source: publisher figshare collection journal article supplement (https://gsajournals.figshare.com/articles/dataset/_/22640890)
Supplement: Supplementary file 1 [file 1]

## Sheet: ST2 - Isolates
Supplementary Table 2. List of clonal strains isolated and sequenced from collected whole-population samples.
Strain ploidy was assessed from the distribution of allele frequencies, as described in the Methods, and only reflects the majority of each strain's genome: i.e. strains may still have regions of aneuploidy or carry other major structural variation.
Isolate code	Pretty label	Site	Year	Source sample code	Replicate	Ploidy	Notes
UIR1a	A18:1(a)	A	2018	UIR_2018_1	a	2
UIR1b	A18:1(b)	A	2018	UIR_2018_1	b	2
UIR1c	A18:1(c)	A	2018	UIR_2018_1	c	2
UIR3a	A18:3(a)	A	2018	UIR_2018_3	a	2
UIR3b	A18:3(b)	A	2018	UIR_2018_3	b	2
UIR3c	A18:3(c)	A	2018	UIR_2018_3	c	3
UIR7a	A18:7(a)	A	2018	UIR_2018_7	a	3
UIR7b	A18:7(b)	A	2018	UIR_2018_7	b	2
UIR9a	A18:9(a)	A	2018	UIR_2018_9	a	2
UIR9b	A18:9(b)	A	2018	UIR_2018_9	b	3
UIR9c	A18:9(c)	A	2018	UIR_2018_9	c	2
UIR17a	A18:17(a)	A	2018	UIR_2018_17	a	3
UIR17b	A18:17(b)	A	2018	UIR_2018_17	b	2
UIR17c	A18:17(c)	A	2018	UIR_2018_17	c	3
UIR27a	A18:27(a)	A	2018	UIR_2018_27	a	2
UIR27b	A18:27(b)	A	2018	UIR_2018_27	b	3
UIR27c	A18:27(c)	A	2018	UIR_2018_27	c	2
UIR47a	A18:47(a)	A	2018	UIR_2018_47	a	2
UIR47b	A18:47(b)	A	2018	UIR_2018_47	b	2
UIR47c	A18:47(c)	A	2018	UIR_2018_47	c	3
UIR57a	A18:57(a)	A	2018	UIR_2018_57	a	3
UIR57b	A18:57(b)	A	2018	UIR_2018_57	b	3
UIR57c	A18:57(c)	A	2018	UIR_2018_57	c	2
UIR109a	A18:109(a)	A	2018	UIR_2018_109	a	3
UIR109b	A18:109(b)	A	2018	UIR_2018_109	b	3
UIR109c	A18:109(c)	A	2018	UIR_2018_109	c	NA	Excluded due to low coverage and unclear ploidy.
UIR167a	A18:167(a)	A	2018	UIR_2018_167	a	2
UIR167b	A18:167(b)	A	2018	UIR_2018_167	b	2
UIR167c	A18:167(c)	A	2018	UIR_2018_167	c	3
UIR217c	A18:217(c)	A	2018	UIR_2018_217	c	3
UIR217d	A18:217(d)	A	2018	UIR_2018_217	d	3
UIR227a	A18:227(a)	A	2018	UIR_2018_227	a	3
UIR227b	A18:227(b)	A	2018	UIR_2018_227	b	3
UIR227c	A18:227(c)	A	2018	UIR_2018_227	c	3
UIR1a_2019	A19:1(a)	A	2019	UIR_2019_1	a	3
UIR1b_2019	A19:1(b)	A	2019	UIR_2019_1	b	3
UIR1c_2019	A19:1(c)	A	2019	UIR_2019_1	c	3
UIR8a_2019	A19:8(a)	A	2019	UIR_2019_8	a	2
UIR8b_2019	A19:8(b)	A	2019	UIR_2019_8	b	2
UIR8c_2019	A19:8(c)	A	2019	UIR_2019_8	c	3
UIR13a_2019	A19:13(a)	A	2019	UIR_2019_13	a	2
UIR13b_2019	A19:13(b)	A	2019	UIR_2019_13	b	2
UIR27a_2019	A19:27(a)	A	2019	UIR_2019_27	a	2
UIR27b_2019	A19:27(b)	A	2019	UIR_2019_27	b	3
UIR38a_2019	A19:38(a)	A	2019	UIR_2019_38	a	3
UIR38b_2019	A19:38(b)	A	2019	UIR_2019_38	b	3
UIR51a_2019	A19:51(a)	A	2019	UIR_2019_51	a	3
UIR51b_2019	A19:51(b)	A	2019	UIR_2019_51	b	3
UIR65a_2019	A19:65(a)	A	2019	UIR_2019_65	a	3
UIR65b_2019	A19:65(b)	A	2019	UIR_2019_65	b	3
UIR77a_2019	A19:77(a)	A	2019	UIR_2019_77	a	2
UIR77b_2019	A19:77(b)	A	2019	UIR_2019_77	b	3
UIR92a_2019	A19:92(a)	A	2019	UIR_2019_92	a	2
UIR92b_2019	A19:92(b)	A	2019	UIR_2019_92	b	2
UIR107a_2019	A19:107(a)	A	2019	UIR_2019_107	a	2
UIR107b_2019	A19:107(b)	A	2019	UIR_2019_107	b	3
UIR134a_2019	A19:134(a)	A	2019	UIR_2019_134	a	3
UIR134b_2019	A19:134(b)	A	2019	UIR_2019_134	b	3	Excluded due to low coverage
UIR150a_2019	A19:150(a)	A	2019	UIR_2019_150	a	2
UIR150b_2019	A19:150(b)	A	2019	UIR_2019_150	b	3
UIR163a_2019	A19:163(a)	A	2019	UIR_2019_163	a	3
UIR163b_2019	A19:163(b)	A	2019	UIR_2019_163	b	3
UIR174a_2019	A19:174(a)	A	2019	UIR_2019_174	a	3
UIR174b_2019	A19:174(b)	A	2019	UIR_2019_174	b	3
UIR174c_2019	A19:174(c)	A	2019	UIR_2019_174	c	3
UCP1a	B18:1(a)	B	2018	UCP_2018_1	a	2
UCP1b	B18:1(b)	B	2018	UCP_2018_1	b	2
UCP1c	B18:1(c)	B	2018	UCP_2018_1	c	2
UCP7a	B18:7(a)	B	2018	UCP_2018_7	a	2
UCP7b	B18:7(b)	B	2018	UCP_2018_7	b	2
UCP9a	B18:9(a)	B	2018	UCP_2018_9	a	2
UCP9b	B18:9(b)	B	2018	UCP_2018_9	b	2
UCP9c	B18:9(c)	B	2018	UCP_2018_9	c	2
UCP27a	B18:27(a)	B	2018	UCP_2018_27	a	2
UCP27b	B18:27(b)	B	2018	UCP_2018_27	b	2
UCP27c	B18:27(c)	B	2018	UCP_2018_27	c	2
UCP47a	B18:47(a)	B	2018	UCP_2018_47	a	2
UCP47b	B18:47(b)	B	2018	UCP_2018_47	b	2
UCP47c	B18:47(c)	B	2018	UCP_2018_47	c	2
UCP57a	B18:57(a)	B	2018	UCP_2018_57	a	2
UCP57b	B18:57(b)	B	2018	UCP_2018_57	b	3
UCP57c	B18:57(c)	B	2018	UCP_2018_57	c	2
UCP77a	B18:77(a)	B	2018	UCP_2018_77	a	2
UCP77b	B18:77(b)	B	2018	UCP_2018_77	b	2
UCP77c	B18:77(c)	B	2018	UCP_2018_77	c	2
UCP87a	B18:87(a)	B	2018	UCP_2018_87	a	2
UCP87b	B18:87(b)	B	2018	UCP_2018_87	b	3
UCP87c	B18:87(c)	B	2018	UCP_2018_87	c	3
UCP109a	B18:109(a)	B	2018	UCP_2018_109	a	2
UCP109b	B18:109(b)	B	2018	UCP_2018_109	b	3
UCP109c	B18:109(c)	B	2018	UCP_2018_109	c	3
UCP147a	B18:147(a)	B	2018	UCP_2018_147	a	3
UCP147b	B18:147(b)	B	2018	UCP_2018_147	b	3
UCP147c	B18:147(c)	B	2018	UCP_2018_147	c	2
UCP167a	B18:167(a)	B	2018	UCP_2018_167	a	2
UCP167b	B18:167(b)	B	2018	UCP_2018_167	b	3
UCP167c	B18:167(c)	B	2018	UCP_2018_167	c	3
UCP197a	B18:197(a)	B	2018	UCP_2018_197	a	3
UCP197b	B18:197(b)	B	2018	UCP_2018_197	b	3
UCP197c	B18:197(c)	B	2018	UCP_2018_197	c	3
UCP201a	B18:201(a)	B	2018	UCP_2018_201	a	3
UCP201b	B18:201(b)	B	2018	UCP_2018_201	b	3
UCP203a	B18:203(a)	B	2018	UCP_2018_203	a	3
UCP203b	B18:203(b)	B	2018	UCP_2018_203	b	3
UCP203c	B18:203(c)	B	2018	UCP_2018_203	c	2
UCP1a_2019	B19:1(a)	B	2019	UCP_2019_1	a	2
UCP1b_2019	B19:1(b)	B	2019	UCP_2019_1	b	2
UCP1c_2019	B19:1(c)	B	2019	UCP_2019_1	c	2
UCP5a_2019	B19:5(a)	B	2019	UCP_2019_5	a	2
UCP5b_2019	B19:5(b)	B	2019	UCP_2019_5	b	2
UCP5c_2019	B19:5(c)	B	2019	UCP_2019_5	c	2
UCP13a_2019	B19:13(a)	B	2019	UCP_2019_13	a	2
UCP13b_2019	B19:13(b)	B	2019	UCP_2019_13	b	2
UCP13c_2019	B19:13(c)	B	2019	UCP_2019_13	c	2
UCP28a_2019	B19:28(a)	B	2019	UCP_2019_28	a	3
UCP28b_2019	B19:28(b)	B	2019	UCP_2019_28	b	3
UCP40a_2019	B19:40(a)	B	2019	UCP_2019_40	a	2
UCP40b_2019	B19:40(b)	B	2019	UCP_2019_40	b	2
UCP54a_2019	B19:54(a)	B	2019	UCP_2019_54	a	2
UCP54b_2019	B19:54(b)	B	2019	UCP_2019_54	b	2
UCP67a_2019	B19:67(a)	B	2019	UCP_2019_67	a	2
UCP67b_2019	B19:67(b)	B	2019	UCP_2019_67	b	2	Excluded due to low coverage
UCP81a_2019	B19:81(a)	B	2019	UCP_2019_81	a	2
UCP81b_2019	B19:81(b)	B	2019	UCP_2019_81	b	2
UCP95a_2019	B19:95(a)	B	2019	UCP_2019_95	a	2
UCP95b_2019	B19:95(b)	B	2019	UCP_2019_95	b	2
UCP109a_2019	B19:109(a)	B	2019	UCP_2019_109	a	3
UCP109b_2019	B19:109(b)	B	2019	UCP_2019_109	b	3
UCP137a_2019	B19:137(a)	B	2019	UCP_2019_137	a	3
UCP137b_2019	B19:137(b)	B	2019	UCP_2019_137	b	3
UCP151a_2019	B19:151(a)	B	2019	UCP_2019_151	a	2
UCP151b_2019	B19:151(b)	B	2019	UCP_2019_151	b	2
UCP172a_2019	B19:172(a)	B	2019	UCP_2019_172	a	3
UCP172b_2019	B19:172(b)	B	2019	UCP_2019_172	b	3
UCP184a_2019	B19:184(a)	B	2019	UCP_2019_184	a	3
UCP184b_2019	B19:184(b)	B	2019	UCP_2019_184	b	3
UCP184c_2019	B19:184(c)	B	2019	UCP_2019_184	c	3
